# Supplementary material for: Construction of Zn(ii) and Cd(ii) metal–organic frameworks of diimidazole and dicarboxylate mixed ligands for the catalytic photodegradation of rhodamine B in water
Source: Royal Society of Chemistry journal article supplement (doi:10.1039/c4ce02074j), 2014-11-24
Supplement: c4ce02074j1.pdf [file c4ce02074j1.pdf]

## Electronic Supplementary Information

### Construction of Zn(II) and Cd(II) metal-organic frameworks of diimidazole and dicarboxylate mixed ligands for catalytic photodegradation of rhodamine B in water†

Chun-Ning Lü,<sup>a</sup> Min-Min Chen,<sup>a</sup> Wen-Hua Zhang,<sup>\*a</sup> Duan-Xiu Li,<sup>a</sup> Ming Dai,<sup>a</sup>  
and Jian-Ping Lang<sup>\*ab</sup>

<sup>a</sup> College of Chemistry, Chemical Engineering and Materials Science, Soochow University,  
Suzhou 215123, People's Republic of China. Fax: +86 512 65882865; Tel: +86 512 65882865;  
E-mail: [jplang@suda.edu.cn](mailto:jplang@suda.edu.cn)

<sup>b</sup> State Key Laboratory of Organometallic Chemistry, Shanghai Institute of Organic Chemistry,  
Chinese Academy of Sciences, Shanghai 200032, People's Republic of China

---

## Contents

|                                                                                                                                                     |   |
|-----------------------------------------------------------------------------------------------------------------------------------------------------|---|
| <b>Fig. S1.</b> Experimental (black) and simulated (red) PXRD patterns for compounds <b>1</b> (a), <b>2</b> (b), <b>3</b> (c) and <b>4</b> (d)..... | 3 |
| <b>Fig. S2.</b> TGA curves for compounds <b>1</b> (red), <b>2</b> (green), <b>3</b> (blue) and <b>4</b> (black).....                                | 5 |

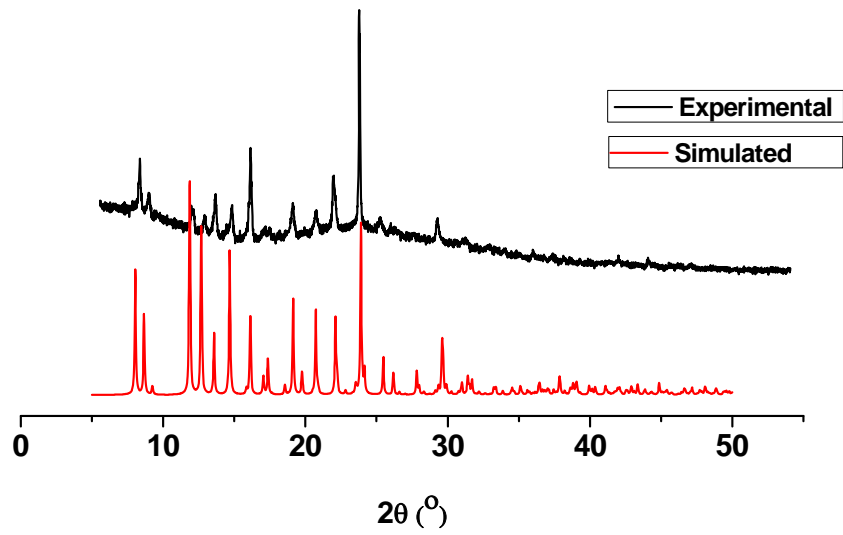

(a)

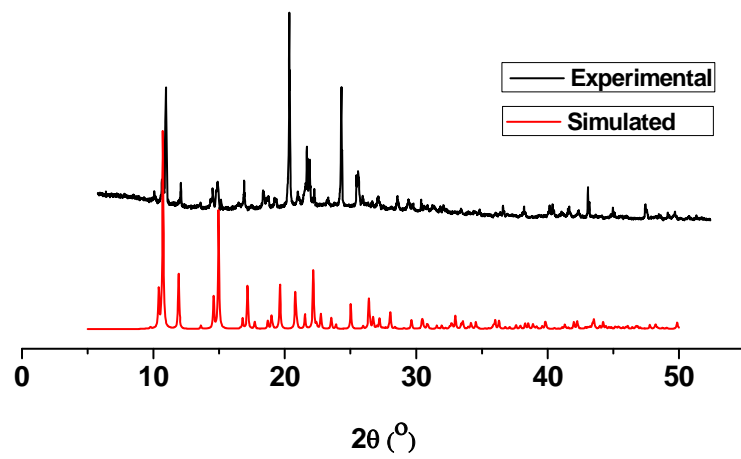

(b)

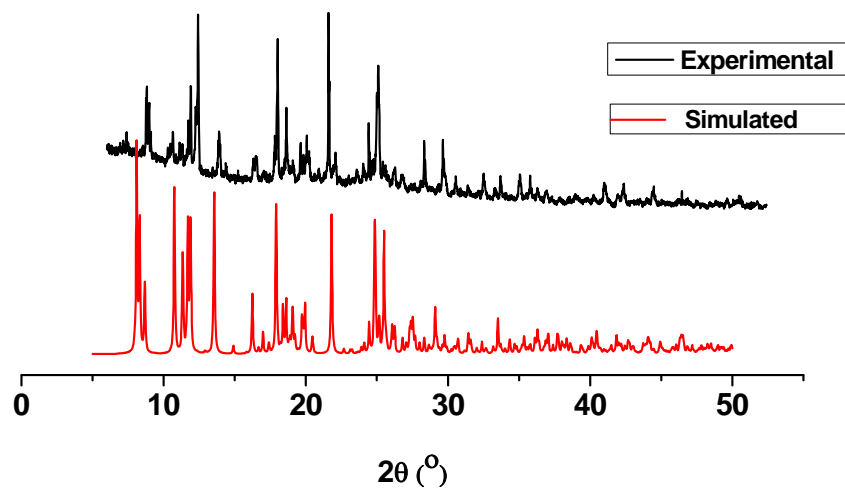

(c)

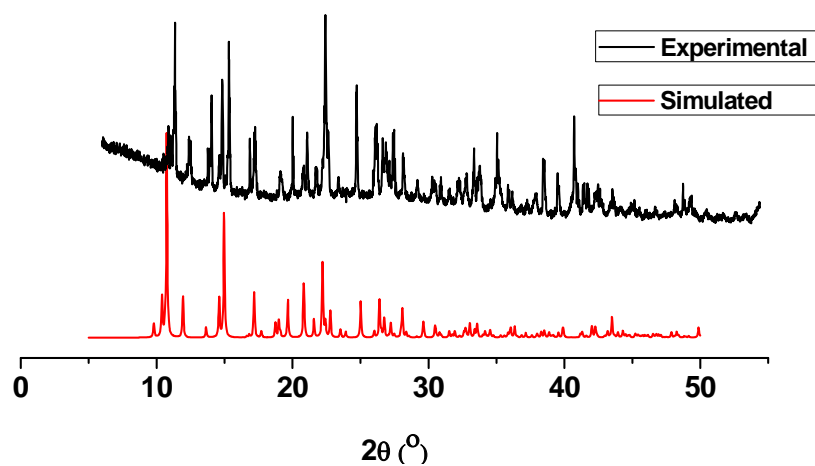

(d)

**Fig. S1.** Experimental (black) and simulated (red) PXRD patterns for compounds **1** (a), **2** (b), **3** (c) and **4** (d).

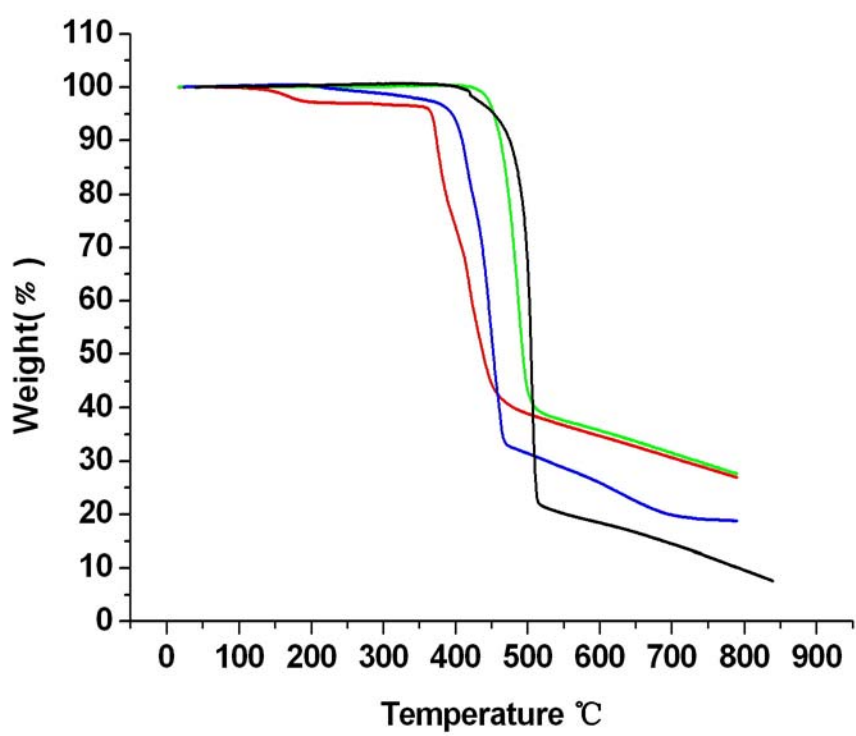

Fig. S2. TGA curves for compounds 1 (red), 2 (green), 3 (blue) and 4 (black).
